# Supplementary material for: Upconversion-nanoparticle-functionalized Janus micromotors for efficient detection of uric acid
Source: Royal Society of Chemistry journal article supplement (doi:10.1039/d1tb02550c), 2021-12-20
Supplement: d1tb02550c1.pdf [file d1tb02550c1.pdf]

## Supporting information

### Upconversion-Nanoparticles-Functionalized Janus Micromotor for Rapid Detection of Uric Acid

Ye Yuan,<sup>a, b</sup> Changyong Gao,<sup>\*c</sup> Zhexu Wang,<sup>a</sup> Jianming Fan,<sup>a</sup> Haofei Zhou,<sup>a</sup> Baohua Zhu,<sup>\*a</sup> and Qiang He<sup>\*b</sup>

<sup>a</sup> Chemistry and Chemical Engineering College, Inner Mongolia University, Hohhot, 010021, China.

Email: [bhzhu@imu.edu.cn](mailto:bhzhu@imu.edu.cn)

<sup>b</sup> Key Laboratory of Microsystems and Microstructures Manufacturing (Ministry of Education), Harbin Institute of Technology, Harbin, 150080, China.

Email: [qianghe@hit.edu.cn](mailto:qianghe@hit.edu.cn)

<sup>c</sup> Cixi Institute of Biomedical Engineering, Ningbo Institute of Materials Technology and Engineering, Chinese Academy of Science, Cixi, 315300, China.

Email: [gaochangyong@nimte.ac.cn](mailto:gaochangyong@nimte.ac.cn)

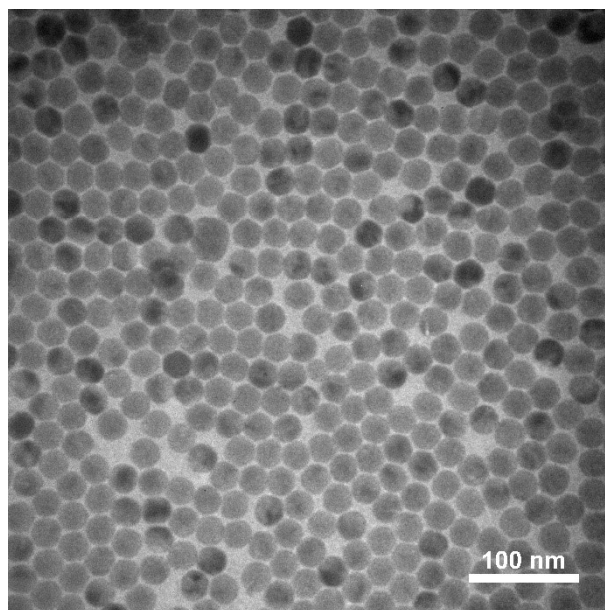

**Fig. S1** SEM image of UCNPs.

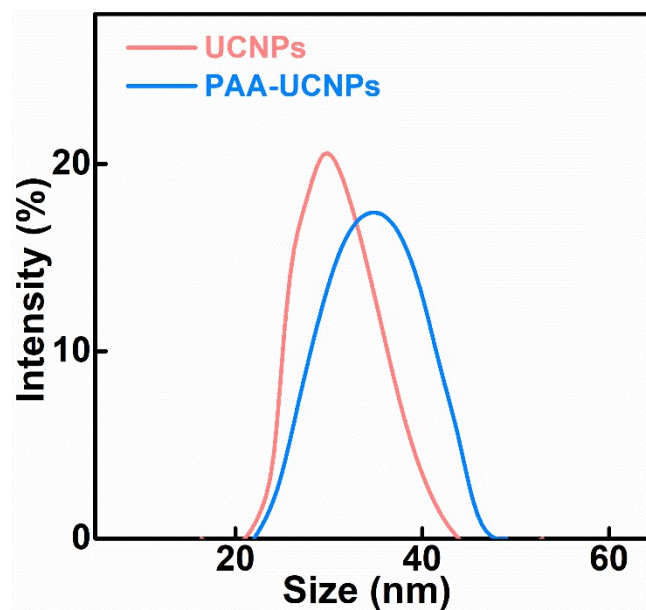

**Fig. S2** DLS size distribution of UCNPs and PAA-UCNPs.

### Supporting videos

**Video S1** A video showing the motion of a JUS motor in 0.5 mM uric acid PBS solution.

**Video S2** A video showing the motion of a JUS motor in 1 mM uric acid PBS solution.

**Video S3** A video showing the motion of a JUS motor in 3 mM uric acid PBS solution.

**Video S4** A video showing the motion of a JUS motor in 5 mM uric acid PBS solution.

**Video S5** A video showing the motion of a JUS motor in PBS solution without uric acid.
